# Supplementary material for: A toolset to study functions of Cytosolic non-specific dipeptidase 2 (CNDP2) using Drosophila as a model organism
Source: PubMed Central journal article supplement (PMC6421639; doi:10.1186/s12863-019-0726-z), 2019-03-18
Supplement: 12863_2019_726_MOESM1_ESM.pdf [file 12863_2019_726_MOESM1_ESM.pdf]

**Table S1.** Primers used for PCR genotyping of *dcNDP2* alleles and PCR product details.

| <b>name</b> | <b>Primer<br/>sequence (5'-&gt;3')</b> | <b>Amplicon</b>                                                             |
|-------------|----------------------------------------|-----------------------------------------------------------------------------|
| gntp-1      | ggagattgccttctcaataaagtgg              | no product from wild-type flies                                             |
| gntp-2      | gtacagagagggagagtcac                   | 2672 bp from homozygous $\Delta$ <i>CNDP2</i> <sup>(mw)</sup> mutant flies  |
| gntp-3      | aaactcgacaccggtataacttc                | no product from wild-type flies                                             |
| gntp-4      | cgttgactctgagaacacttctctg              | 2800 bp from homozygous $\Delta$ <i>CNDP2</i> <sup>(mw)</sup> mutant flies  |
| gntp-5      | ttttggcaggtaaacaataaaaacg              | 5457 bp from wild-type flies                                                |
| gntp-6      | athtagctgtttccagacgatag                | 4332 bp from homozygous $\Delta$ <i>CNDP2</i> <sup>(mw)</sup> mutant flies  |
|             |                                        | 1271 bp from homozygous $\Delta$ <i>dcNDP2</i> mutant flies                 |
| gntp-5      | ttttggcaggtaaacaataaaaacg              | 2382 bp from wild-type flies                                                |
| gntp-7      | tccattccaccatacgaccg                   | 2467 bp from homozygous $\Delta$ <i>dcNDP2</i> <sup>(rescue+mw)</sup> flies |
|             |                                        | 2467 bp from homozygous $\Delta$ <i>dcNDP2</i> <sup>(rescue)</sup> flies    |
| gntp-8      | gacgaacaaatgaaaatctgctgtg              | 1354 bp from wild-type flies                                                |
| gntp-6      | athtagctgtttccagacgatag                | 7551 bp from homozygous $\Delta$ <i>dcNDP2</i> <sup>(rescue+mw)</sup> flies |
|             |                                        | 1435 bp from homozygous $\Delta$ <i>dcNDP2</i> <sup>(rescue)</sup> flies    |
| gntp-9      | catgatgaaataacataaggtgtcc              | no product from wild-type flies                                             |
| gntp-6      | athtagctgtttccagacgatag                | 992 bp from homozygous $\Delta$ <i>dcNDP2</i> <sup>(rescue+mw)</sup> flies  |
