# Supplementary material for: A toolset to study functions of Cytosolic non-specific dipeptidase 2 (CNDP2) using Drosophila as a model organism
Source: PubMed Central journal article supplement (PMC6421639; doi:10.1186/s12863-019-0726-z), 2019-03-18
Supplement: 12863_2019_726_MOESM2_ESM.pdf [file 12863_2019_726_MOESM2_ESM.pdf]

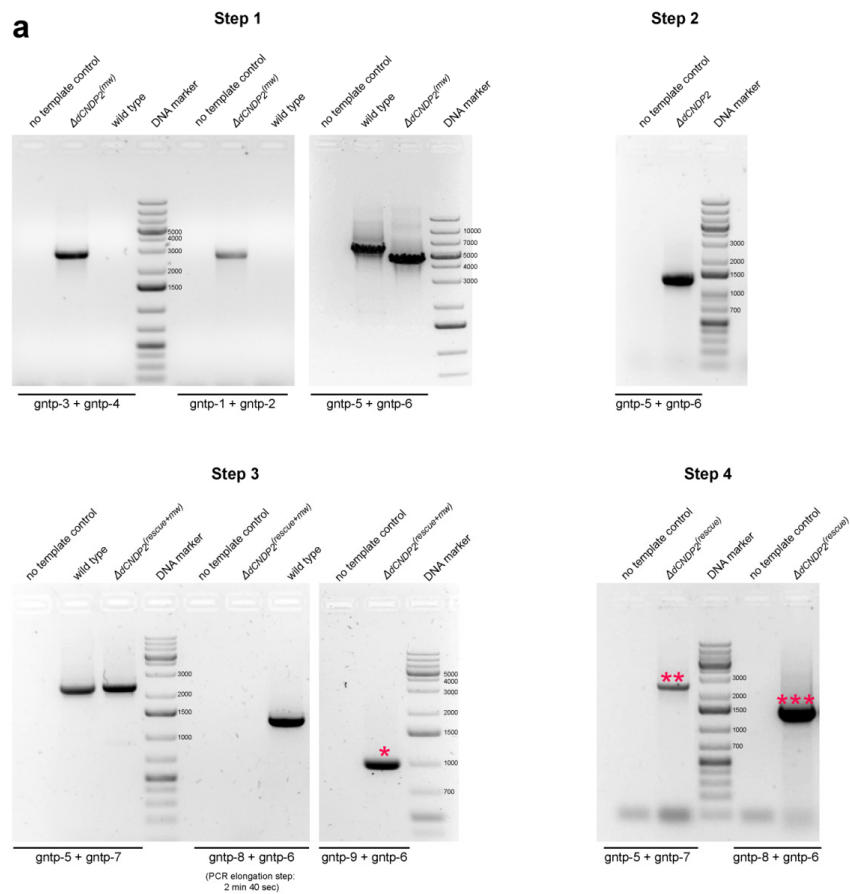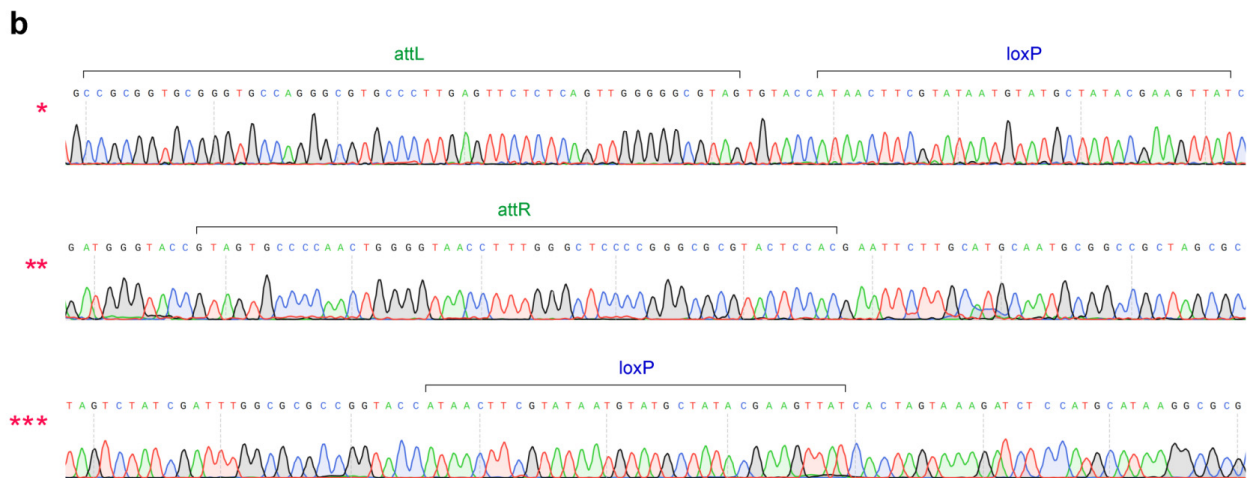

**Figure S1.** Molecular verification of *dCNDP2* alleles. **a** Agarose gel electrophoresis of PCR products obtained by using a set of allele-specific primer pairs (primers sequences are provided in Table S1) and DNA isolated from the indicated fly lines and water (as a negative control) as template. For the explanation of the steps 1-4, see Fig. 1b. Asterisks indicate PCR products that were partially sequenced. **b** Fragments of sequencing chromatograms of the indicated PCR products.
